# Supplementary material for: Synthesis of bio-based polyester elastomers and evaluation of their in vivo biocompatibility and biodegradability as biomedical materials
Source: Royal Society of Chemistry journal article supplement (doi:10.1039/d2bm00436d), 2022-01-01
Supplement: d2bm00436d1.pdf [file d2bm00436d1.pdf]

## Supporting Information

### Synthesis of bio-based polyester elastomers and evaluation of the in vivo biocompatibility and biodegradability as biomedical materials

*Yu Gao,<sup>a,b</sup> Jiajia Xue,<sup>a,b</sup> Liqun Zhang,<sup>a,b,\*</sup> and Zhao Wang<sup>a,b,\*</sup>*

<sup>a</sup>Beijing Laboratory of Biomedical Materials, Beijing University of Chemical Technology, Beijing 100029, P. R. China

<sup>b</sup>State Key Laboratory of Organic-Inorganic Composites, Beijing University of Chemical Technology, Beijing 100029, P. R. China

\*Corresponding authors: [zhanglq@mail.buct.edu.cn](mailto:zhanglq@mail.buct.edu.cn) (Prof. Liqun Zhang),  
[wangzhao@mail.buct.edu.cn](mailto:wangzhao@mail.buct.edu.cn) (Prof. Zhao Wang)

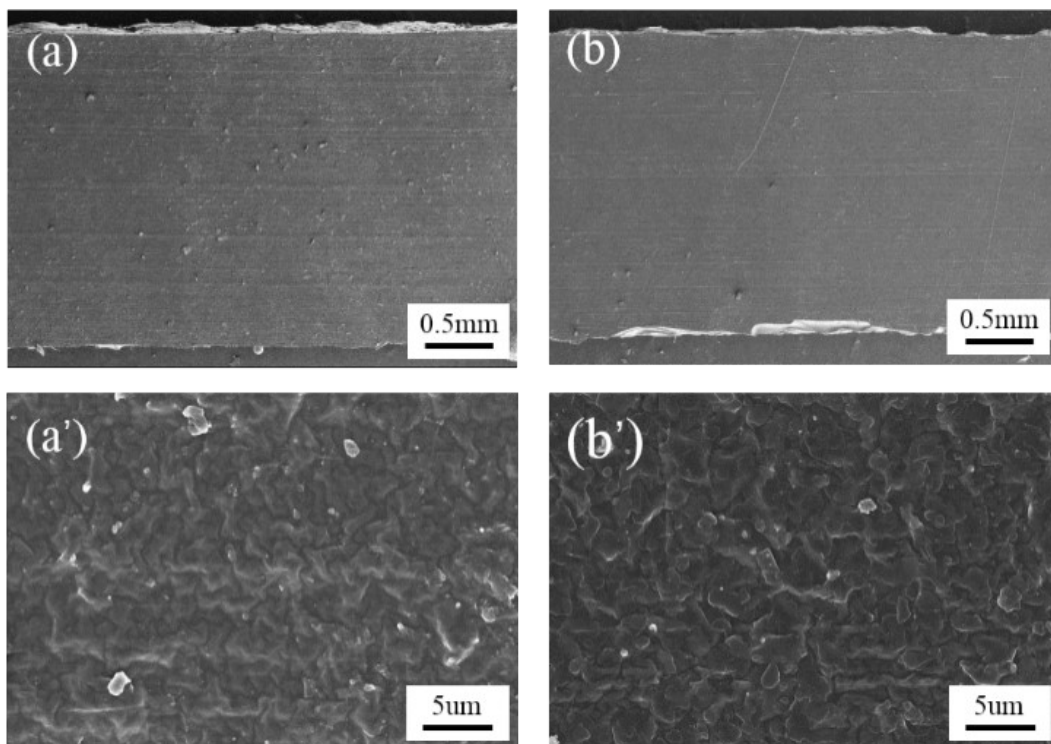

**Figure S1.** The scanning electron micrograph of BPE: (a) the surface of undegraded sample( $\times 35$ ); (a') the surface of undegraded sample( $\times 200$ ); (b) the surface of BPE soaked in protease solution( $\times 35$ ); (b') the surface of BPE soaked in protease solution( $\times 200$ ).

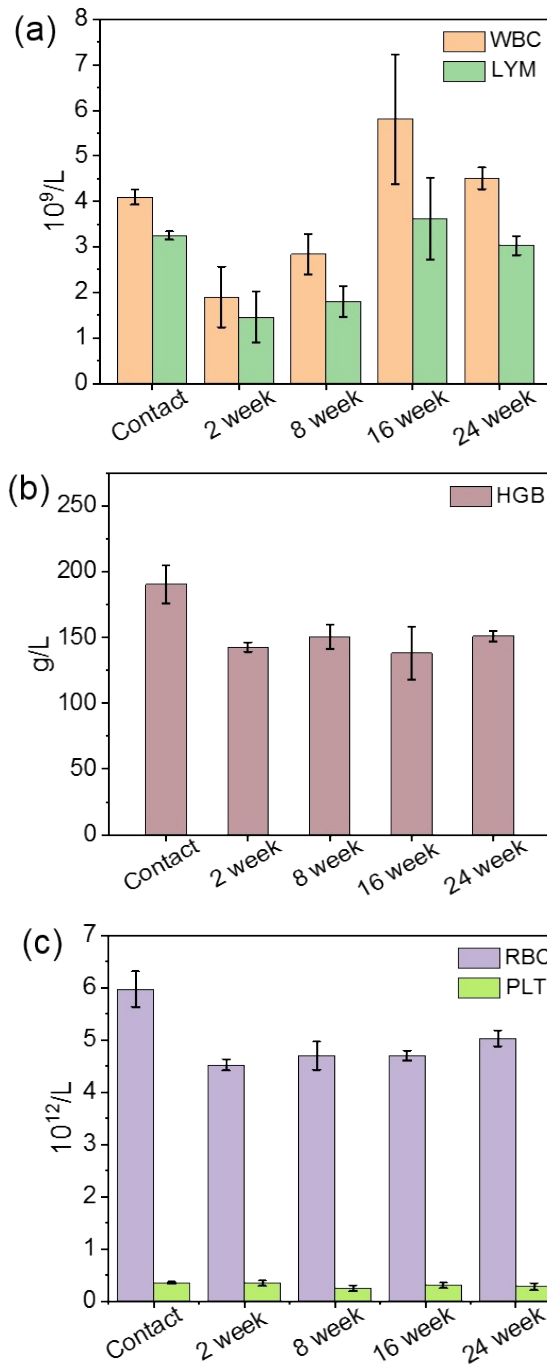

**Figure S2.** Mice blood routine index of (a) white blood cell and lymphocyte index, (b) hemoglobin index, (c) red blood cell and platelet index.

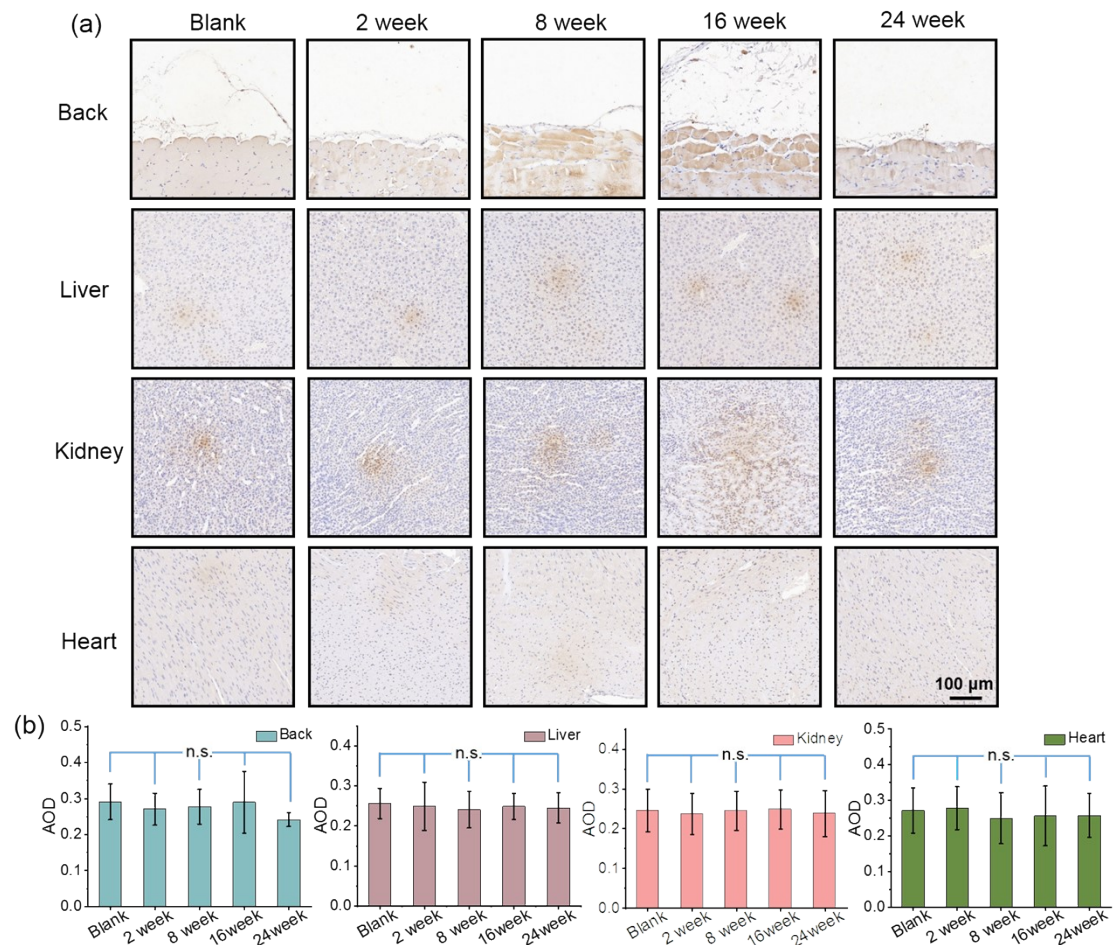

**Figure S3.** Inflammatory marker staining and cytokine profiling analysis after implantation. (a) Immunohistochemical staining of inflammatory markers (IL-6) in tissues surrounding BPE and liver, kidney, heart tissues, cells stained by inflammatory markers show brown color. (b) Quantification of inflammatory marker expression ( ns means no significant difference, the full-images of back tissue can be found in Figure S4).

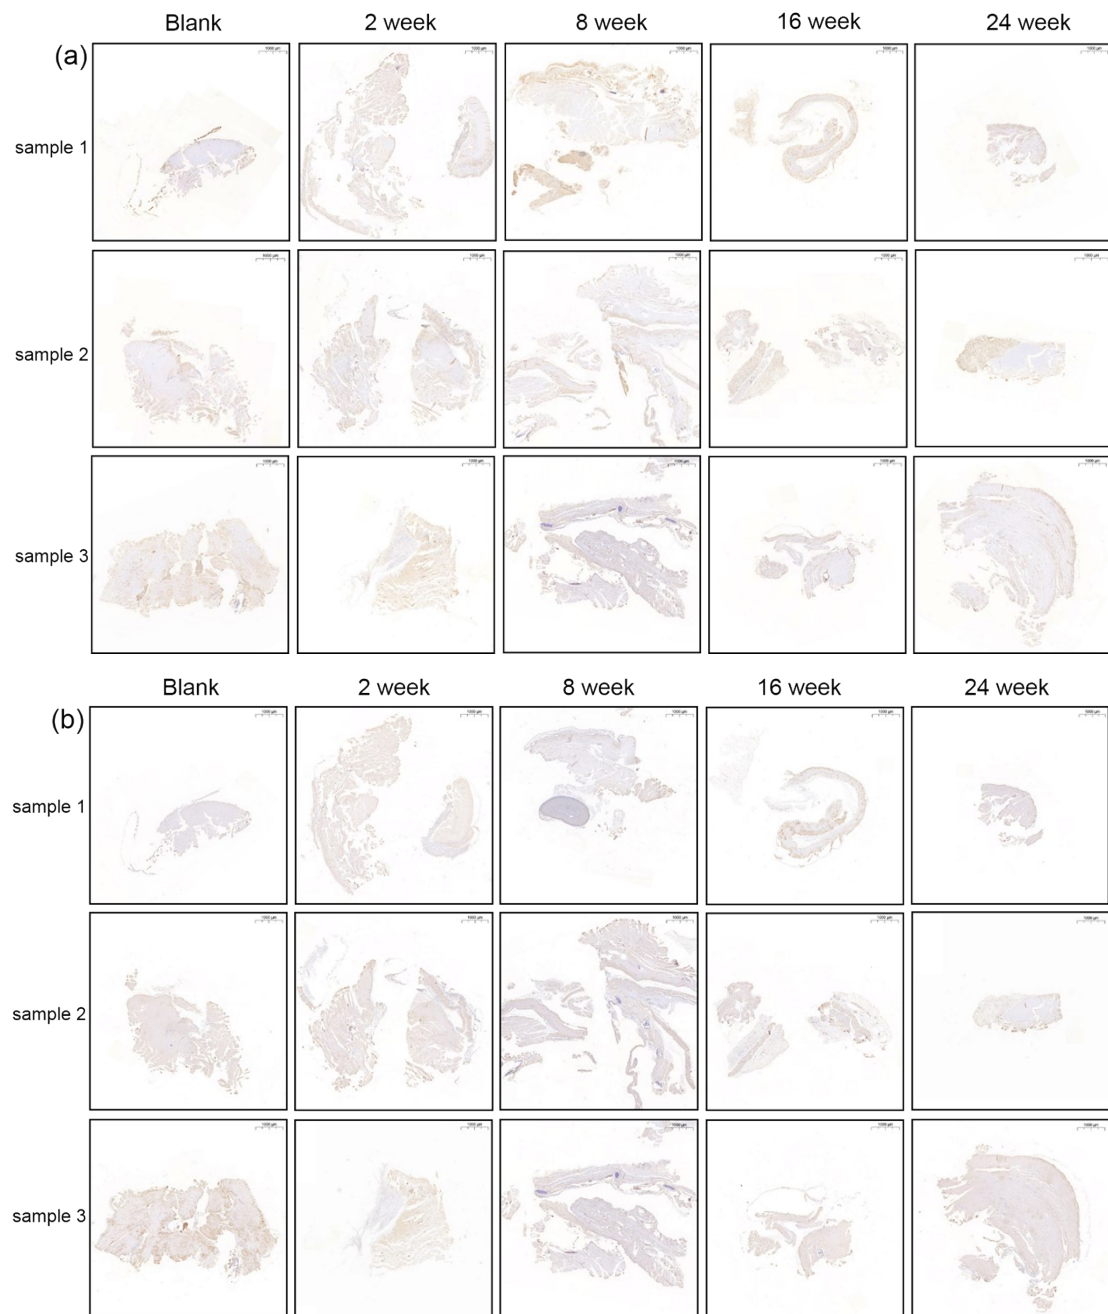

**Figure S4.** The full-images of inflammatory marker staining of the back tissue after implantation, each column is a parallel sample from the same time point. (a) Immunohistochemical staining of inflammatory markers (TNF-a) in tissues under different time, cells stained by inflammatory markers show brown color. (b) Immunohistochemical staining of inflammatory markers (IL-6) in tissues under different time, cells stained by inflammatory markers show brown color.
